# Supplementary material for: Reduced graphene oxide/polyaniline wrapped carbonized sponge with elasticity for energy storage and pressure sensing
Source: Royal Society of Chemistry journal article supplement (doi:10.1039/d1nj00074h), 2021-01-01
Supplement: d1nj00074h1.pdf [file d1nj00074h1.pdf]

## Supporting Information

### **Reduced graphene oxide/polyaniline wrapped carbonized sponge with elasticity for energy storage and pressure sensor**

Shichao Huang<sup>a</sup>, Jialun Li<sup>a</sup>, Xueyu Zhang<sup>\*b</sup>, Xijia Yang<sup>a</sup>, Liying Wang<sup>a</sup>, Xuesong  
Li<sup>a</sup>, and Wei Lü<sup>\*a</sup>

<sup>a</sup> Key Laboratory of Advanced Structural Materials, Ministry of Education &  
Advanced Institute of Materials Science, Changchun University of Technology,  
Changchun 130012, China

<sup>b</sup> Institute of Oceanographic Instrumentation, Qilu University of Technology  
(Shandong Academy of Sciences), Shandong Provincial Key Laboratory of Marine  
Monitoring Instrument Equipment Technology, National Engineering and  
Technological Research Center of Marine Monitoring Equipment, Qingdao 266100,  
China

Address correspondence to E-mail: [dlut417@163.com](mailto:dlut417@163.com), [lw771119@hotmail.com](mailto:lw771119@hotmail.com)

Fax: +86-0431-85716577; Tel: +86-0431-85716577

\* To whom all correspondence should be addressed.

### **Characterization**

The morphologies and structures of samples were characterized by field emission scanning microscopy (FESEM, 7610, JEOL) and D-MAX II A X-ray diffractometer (XRD). FTIR was carried out using a Nicolet-6700 (Thermofisher). The compressive stress-strain measurements of the symmetrical supercapacitors device was carried out

by tensile and compression tester (SHIMADZU, model AGS-X, 100N, Japan).

### **Electrochemical measurement**

The electrochemical performance was carried out using a CHI 660E electrochemical workstation. In the three-electrode configuration, the platinum foil and Ag/AgCl electrodes were used as counter and reference electrodes. The electrolyte was 1M H<sub>2</sub>SO<sub>4</sub>. CV measurements and GCD curves were tested at the potential range of 0 V to 1 V. The EIS measurement were recorded under an open circuit potential in the frequency range of 0.01-10000 Hz with a modulating amplitude of 5 mV. The specific capacitance of samples was calculated according to the following two equations:

$$C_m = \frac{I\Delta t}{m\Delta V} \quad (S1)$$

$$C_m = \frac{1}{Uvm} \int_{U^-}^{U^+} i(U)dU \quad (S2)$$

In the equation (1), I is the charge-discharge current density, Δt is discharge time, ΔV is the operate voltage window and m is the mass loading of the active material in samples. In the equation (2), U is the voltage window (U=U<sup>+</sup>-U<sup>-</sup>), m is the mass of active materials in electrode, and v is scan rate (mV s<sup>-1</sup>) of the CV curve.

The symmetric supercapacitor was fabricated using two pieces of CF-RGO-PANI-600 samples as electrodes, sandwiched with cellulose separator, with 1 M H<sub>2</sub>SO<sub>4</sub> as electrolyte. The specific capacitance of device was calculated using the charge integrated from GCD and CV curves individually according to the following formulas:

$$C_m = 2 \frac{I\Delta t}{m\Delta V} \quad (S3)$$

$$C_m = 2 \frac{1}{Uvm} \int_{U^-}^{U^+} i(U) dU \quad (S4)$$

In the formula (3),  $I$  is the charge-discharge current density,  $\Delta t$  is discharge time,  $\Delta V$  is the operate voltage window and  $m$  is the mass loading of the active material in two-electrode. In the formula (4),  $U$  is the voltage window ( $U=U^+-U^-$ ),  $m$  is the mass of active materials in two electrodes, and  $v$  is scan rate ( $\text{mV s}^{-1}$ ) of the CV curve. Subsequently, the energy density ( $E$ ) and power density ( $P$ ) of two electrodes device were calculated using the following formulas:

$$E = \frac{1}{7.2} CU^2 \quad (S5)$$

$$P = \frac{E}{\Delta t} \times 3600 \quad (S6)$$

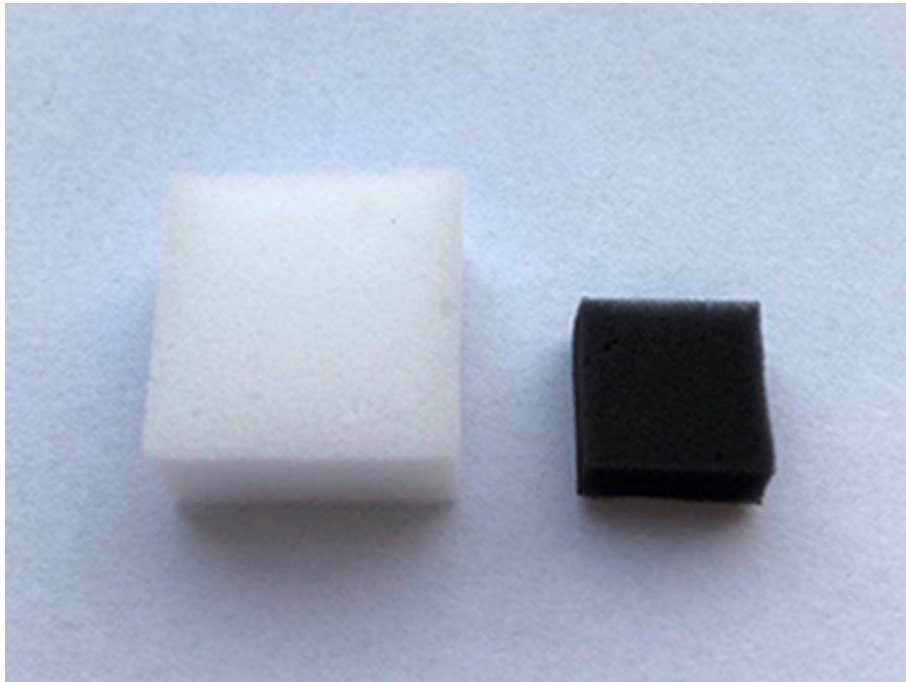

**Figure S1.** Photo of the melamine and carbon foam(CF).

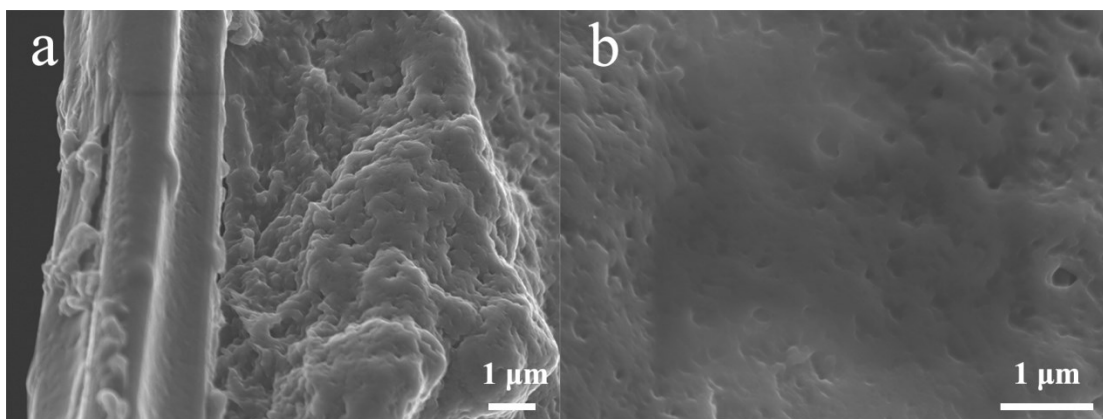

Figure S2. SEM images of the CF-RGO-PANI-900.

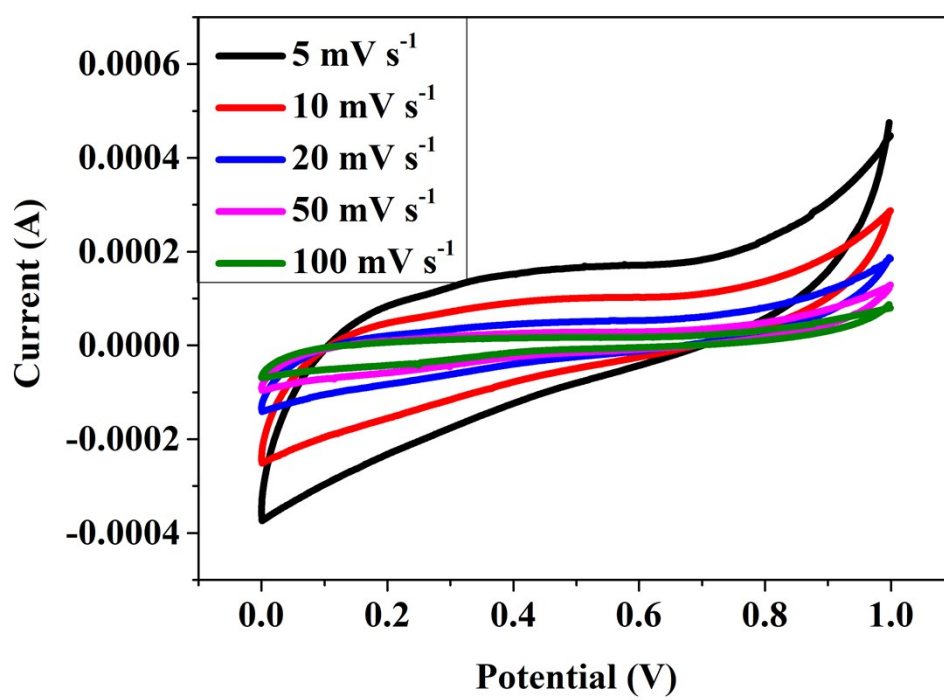

Figure S3. CV curves of CF at different scanning rates.

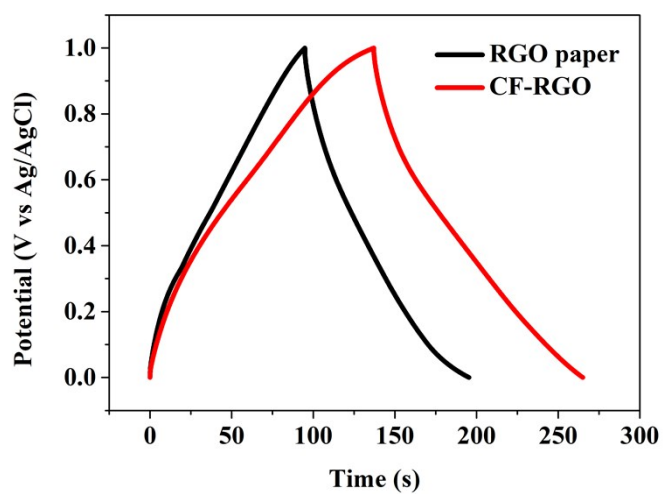

**Figure S4.** The charge-discharge performance comparison of CF-RGO and RGO paper.

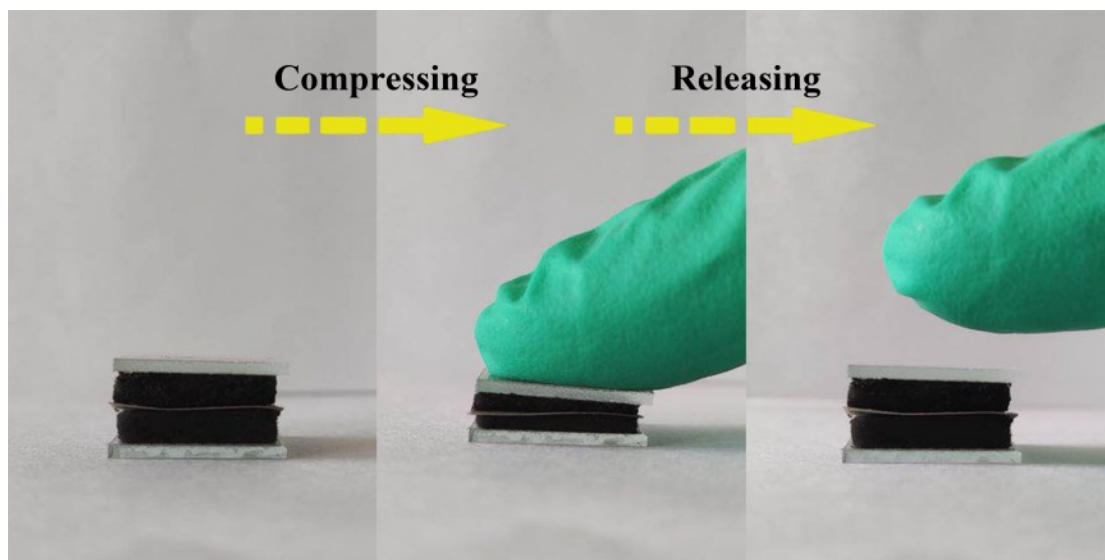

**Figure S5.** An optical image of an assembled supercapacitor device demonstrating compression and recovery.

**Table S1.** Energy density and power density of different PANI-based electrodes

| <b>Electrode materials</b>       | <b>Electrolyte</b>                                    | <b>Energy density</b>     | <b>Power density</b>      | <b>Refers.</b> |
|----------------------------------|-------------------------------------------------------|---------------------------|---------------------------|----------------|
| CF-RGO-PANI-600                  | 1M H <sub>2</sub> SO <sub>4</sub>                     | 10.25 Wh kg <sup>-1</sup> | 10000 W kg <sup>-1</sup>  | This work      |
| RGO-PANI/carbon cloth            | 1M H <sub>2</sub> SO <sub>4</sub>                     | 11.38 Wh kg <sup>-1</sup> | 199.8 W kg <sup>-1</sup>  | 25             |
| Polyaniline/boron-doped graphene | 1M H <sub>2</sub> SO <sub>4</sub>                     | 5.6 Wh kg <sup>-1</sup>   | 2616.7 W kg <sup>-1</sup> | 26             |
| PANI/SWCNTs film                 | PVA/H <sub>2</sub> SO <sub>4</sub><br>Gel electrolyte | 19.45 Wh kg <sup>-1</sup> | 320.5 W kg <sup>-1</sup>  | 27             |
| CNFs/PANI                        | PVA/H <sub>2</sub> SO <sub>4</sub><br>Gel electrolyte | 4.4 Wh kg <sup>-1</sup>   | 2700 W kg <sup>-1</sup>   | 28             |
| Ni-G-CNFs@PANI                   | PVA/H <sub>2</sub> SO <sub>4</sub><br>gel electrolyte | 14.4 Wh kg <sup>-1</sup>  | 375.2 W kg <sup>-1</sup>  | 29             |
| RGO/PANI                         | 1M H <sub>2</sub> SO <sub>4</sub>                     | 9.8 Wh kg <sup>-1</sup>   | 2000 W kg <sup>-1</sup>   | 30             |
